# Supplementary material for: Board Gender Diversity Reforms Around the World: The Impact on Corporate Innovation
Source: Atypon-hosted journal article supplement (doi:10.1287/orsc.22.16956), 2024-11-14
Supplement: orsc.22.16956.sm1.pdf [file orsc.22.16956.sm1.pdf]

## ONLINE SUPPLEMENT TO "BOARD GENDER DIVERSITY REFORMS AROUND THE WORLD: THE IMPACT ON CORPORATE INNOVATION"

### Appendix A. Characteristics of Board Gender Diversity Reforms

Table A1. Major board gender diversity reforms

|     |                | (1)<br>Reform Effective Year | (2)<br>Enforcement Type |
|-----|----------------|------------------------------|-------------------------|
| 1.  | Australia      | 2013                         | Rule-based              |
| 2.  | Austria        | 2009                         | Comply-or-explain       |
| 3.  | Belgium        | 2012                         | Rule-based              |
| 4.  | Denmark        | 2013                         | Comply-or-explain       |
| 5.  | Finland        | 2010                         | Comply-or-explain       |
| 6.  | France         | 2011                         | Rule-based              |
| 7.  | Greece         | 2013                         | Comply-or-explain       |
| 8.  | Hong Kong      | 2013                         | Comply-or-explain       |
| 9.  | Iceland        | 2013                         | Rule-based              |
| 10. | Ireland        | 2012                         | Comply-or-explain       |
| 11. | Italy          | 2011                         | Rule-based              |
| 12. | Luxembourg     | 2009                         | Comply-or-explain       |
| 13. | Malaysia       | 2011                         | Comply-or-explain       |
| 14. | Netherlands    | 2013                         | Comply-or-explain       |
| 15. | Norway         | 2006                         | Rule-based              |
| 16. | Poland         | 2010                         | Comply-or-explain       |
| 17. | Singapore      | 2012                         | Comply-or-explain       |
| 18. | Spain          | 2007                         | Rule-based              |
| 19. | Sweden         | 2004                         | Comply-or-explain       |
| 20. | Thailand       | 2011                         | Comply-or-explain       |
| 21. | United Kingdom | 2012                         | Comply-or-explain       |

Table A2. First board gender diversity reforms

|     |                | (1)<br>Reform Effective Year | (2)<br>Enforcement Type |
|-----|----------------|------------------------------|-------------------------|
| 1.  | Australia      | 2010                         | Comply-or-explain       |
| 2.  | Austria        | 2009                         | Comply-or-explain       |
| 3.  | Belgium        | 2009                         | Comply-or-explain       |
| 4.  | Denmark        | 2008                         | Comply-or-explain       |
| 5.  | Finland        | 2010                         | Comply-or-explain       |
| 6.  | France         | 2010                         | Comply-or-explain       |
| 7.  | Greece         | 2013                         | Comply-or-explain       |
| 8.  | Hong Kong      | 2013                         | Comply-or-explain       |
| 9.  | Iceland        | 2010                         | Rule-based              |
| 10. | Ireland        | 2012                         | Comply-or-explain       |
| 11. | Italy          | 2011                         | Rule-based              |
| 12. | Luxembourg     | 2009                         | Comply-or-explain       |
| 13. | Malaysia       | 2011                         | Rule-based              |
| 14. | Netherlands    | 2009                         | Comply-or-explain       |
| 15. | Norway         | 2003                         | Rule-based              |
| 16. | Poland         | 2010                         | Comply-or-explain       |
| 17. | Singapore      | 2012                         | Comply-or-explain       |
| 18. | Spain          | 2006                         | Comply-or-explain       |
| 19. | Sweden         | 2004                         | Comply-or-explain       |
| 20. | Thailand       | 2011                         | Comply-or-explain       |
| 21. | United Kingdom | 2010                         | Comply-or-explain       |

*Notes.* This table reports the characteristics of board gender diversity reforms for countries that implemented such reforms during the sample period. Column 1 presents the year in which the reform becomes effective. Columns 2 reports the types of enforcement (i.e., comply-or-explain versus rule-based). Tables A1 and A2 describe the major reforms and first reforms, respectively. For countries that implement only one reform, we classify the reform as both the first and major reform.

## Appendix B. Variable Definitions and Data Sources

| Variable                                                                   | Definition                                                                                                                                                                                                                                                    | Data Source      |
|----------------------------------------------------------------------------|---------------------------------------------------------------------------------------------------------------------------------------------------------------------------------------------------------------------------------------------------------------|------------------|
| <b>Dependent variables</b>                                                 |                                                                                                                                                                                                                                                               |                  |
| <i>Patent counts</i>                                                       | The natural logarithm of 1 plus firm <i>i</i> 's total number of patents filed (and eventually granted) in the year.                                                                                                                                          | Orbis            |
| <i>Patent citations</i>                                                    | The natural logarithm of 1 plus the total number of citations received for the firm's patents filed (and eventually granted) in the year.                                                                                                                     | Orbis            |
| <i>Female representation</i>                                               | The ratio of female directors without major committee (audit, compensation, nomination, and governance) roles to the total number of directors in a given year.                                                                                               | BoardEx          |
| <i>Female empowerment</i>                                                  | The ratio of female directors with major committee (audit, compensation, nomination, and governance) roles to the total number of directors in a given year.                                                                                                  | BoardEx          |
| <i>Female empowerment_chair</i>                                            | The ratio of female directors who serve as chairs on major committee (audit, compensation, nomination, and governance) roles to the total number of directors in a given year.                                                                                | BoardEx          |
| <i>Female empowerment_member</i>                                           | The ratio of female directors who serve as members on major committee (audit, compensation, nomination, and governance) roles to the total number of directors in a given year.                                                                               | BoardEx          |
| <b>Key variables of interest</b>                                           |                                                                                                                                                                                                                                                               |                  |
| <i>After reform</i>                                                        | Indicator variable that equals 1 starting from the year in which a board gender diversity reform becomes effective in the country, and 0 otherwise.                                                                                                           | Own construction |
| <i>Reform country</i>                                                      | Indicator variable that equals 1 if a firm's listing country implements board gender diversity reforms, and 0 otherwise.                                                                                                                                      | Own construction |
| $\Delta$ <i>Female representation</i> <sub>(2 years post-reform)</sub>     | The average <i>Female representation</i> over the two years after reform, less the average <i>Female representation</i> over the five years before the reform, divided by the average <i>Female representation</i> over the two years before the reform.      | Own construction |
| $\Delta$ <i>Female empowerment</i> <sub>(2 years post-reform)</sub>        | The average <i>Female empowerment</i> over the two years after reform, less the average <i>Female empowerment</i> over the five years before the reform, divided by the average <i>Female empowerment</i> over the two years before the reform.               | Own construction |
| $\Delta$ <i>Female empowerment_chair</i> <sub>(2 years post-reform)</sub>  | The average <i>Female empowerment_chair</i> over the two years after reform, less the average <i>Female empowerment_chair</i> over the five years before the reform, divided by the average <i>Female empowerment</i> over the two years before the reform.   | Own construction |
| $\Delta$ <i>Female empowerment_member</i> <sub>(2 years post-reform)</sub> | The average <i>Female empowerment_member</i> over the two years after reform, less the average <i>Female empowerment_member</i> over the five years before the reform, divided by the average <i>Female empowerment</i> over the two years before the reform. | Own construction |
| <i>Year -3</i>                                                             | Indicator variable that equals 1, indicating 3 years before implementation of the board gender diversity reform.                                                                                                                                              | Own construction |
| <i>Year -2</i>                                                             | Indicator variable that equals 1, indicating 2 years before implementation of the board gender diversity reform.                                                                                                                                              | Own construction |
| <i>Year -1</i>                                                             | Indicator variable that equals 1, indicating 1 year before implementation of the board gender diversity reform.                                                                                                                                               | Own construction |
| <i>Year 0</i>                                                              | Indicator variable that equals 1, indicating the year of implementation of the board gender diversity reform.                                                                                                                                                 | Own construction |
| <i>Year 1</i>                                                              | Indicator variable that equals 1 in the first year after implementation of the board gender diversity reform.                                                                                                                                                 | Own construction |
| <i>Year 2</i>                                                              | Indicator variable that equals 1 in the second year after implementation of the board gender diversity reform.                                                                                                                                                | Own construction |

|                                |                                                                                                                                                                                                                                         |                    |
|--------------------------------|-----------------------------------------------------------------------------------------------------------------------------------------------------------------------------------------------------------------------------------------|--------------------|
| <i>Year 3+</i>                 | Indicator variable that equals 1 in the third and subsequent years after implementation of the board gender diversity reform.                                                                                                           | Own construction   |
| <i>After reform_pseudo1</i>    | Indicator variable that equals one starting from the year in which a pseudo board gender diversity reform (3 years prior to the actual reform year) becomes effective in the country, and 0 otherwise.                                  | Own construction   |
| <i>After reform_pseudo2</i>    | Indicator variable that equals one starting from the year in which a pseudo board gender diversity reform (5 years prior to the actual reform year) becomes effective in the country, and 0 otherwise.                                  | Own construction   |
| <i>Comply</i>                  | Indicator variable that equals 1 if the comply-or-explain reform (rule-based reform) is implemented in the country.                                                                                                                     | Own construction   |
| <i>High_supply</i>             | Indicator variable that equals 1 if the firm is in a country where the average proportion of female employment in senior and middle management positions in non-reform period is above than the sample country median, and 0 otherwise. | The United Nations |
| <i>High_GII</i>                | Indicator variable that equals 1 if the firm is in a country where the average Gender Inequality Index in non-reform period above the sample country median, and 0 otherwise.                                                           | The United Nations |
| <b>Other variables</b>         |                                                                                                                                                                                                                                         |                    |
| <i>Firm size</i>               | The natural logarithm of total assets (in millions of U.S. dollars).                                                                                                                                                                    | Worldscope         |
| <i>R&amp;D expenditure</i>     | Research and development expenditure scaled by sales.                                                                                                                                                                                   | Worldscope         |
| <i>Returns on assets</i>       | Net income before extraordinary items scaled by beginning total assets.                                                                                                                                                                 | Worldscope         |
| <i>Sales growth</i>            | Annual change in net sales scaled by beginning total assets.                                                                                                                                                                            | Worldscope         |
| <i>Leverage</i>                | Total liabilities scaled by total assets.                                                                                                                                                                                               | Worldscope         |
| <i>K/L</i>                     | The natural logarithm of the ratio of net property, plant, and equipment (in thousands) to the number of employees.                                                                                                                     | Worldscope         |
| <i>Capital expenditure</i>     | The ratio of a firm's total capital expenditures to total assets.                                                                                                                                                                       | Worldscope         |
| <i>Cash holding</i>            | Cash holding scaled by total assets.                                                                                                                                                                                                    | Worldscope         |
| <i>Foreign sales</i>           | Foreign sales scaled by total sales.                                                                                                                                                                                                    | Worldscope         |
| <i>Insider ownership</i>       | The total number of closely held shares as a percentage of the total number of shares outstanding.                                                                                                                                      | Worldscope         |
| <i>Institutional ownership</i> | The percentage of a firm's shares held by all types of institutional investors.                                                                                                                                                         | FactSet            |
| <i>HHI</i>                     | Industry Herfindahl–Hirschman Index based on all firms within each country, with industries defined by the 3-digit standard industrial classification code.                                                                             | Worldscope         |
| <i>HHI<sup>2</sup></i>         | The squared term of <i>HHI</i> .                                                                                                                                                                                                        | Worldscope         |
| <i>GDP per capital</i>         | The natural logarithm of gross domestic product per capita.                                                                                                                                                                             | World Bank         |
| <i>CEO compensation</i>        | The natural logarithm of the sum of all CEO compensation: salary, bonus, equity-linked, pension and other.                                                                                                                              | BoardEx            |
| <i>CEO female</i>              | Indicator variable that equals 1 if the firm's CEO is female and 0 otherwise.                                                                                                                                                           | BoardEx            |

## Appendix C. Assessing the Parallel Trends Assumption

Table C1. Dynamic effect of board gender diversity reforms

| Dep. Var.                       | (1)                              | (2)                                 | (3)                                      | (4)                                   |
|---------------------------------|----------------------------------|-------------------------------------|------------------------------------------|---------------------------------------|
| Sample                          | <i>Patent counts<sub>t</sub></i> | <i>Patent citations<sub>t</sub></i> | <i>Female representation<sub>t</sub></i> | <i>Female empowerment<sub>t</sub></i> |
|                                 | Full                             | Full                                | BoardEx                                  | BoardEx                               |
| <i>Year -3 × Reform country</i> | -0.004<br>(0.731)                | 0.004<br>(0.862)                    | 0.001<br>(0.785)                         | -0.003<br>(0.151)                     |
| <i>Year -2 × Reform country</i> | -0.000<br>(0.993)                | 0.008<br>(0.738)                    | 0.002<br>(0.532)                         | -0.002<br>(0.529)                     |
| <i>Year -1 × Reform country</i> | 0.003<br>(0.858)                 | 0.003<br>(0.910)                    | 0.005<br>(0.275)                         | 0.001<br>(0.835)                      |
| <i>Year 0 × Reform country</i>  | 0.038*<br>(0.058)                | 0.055*<br>(0.061)                   | 0.010**<br>(0.036)                       | 0.003<br>(0.389)                      |
| <i>Year 1 × Reform country</i>  | 0.070**<br>(0.011)               | 0.072**<br>(0.024)                  | 0.016***<br>(0.003)                      | 0.006*<br>(0.063)                     |
| <i>Year 2 × Reform country</i>  | 0.123***<br>(0.001)              | 0.106***<br>(0.004)                 | 0.022***<br>(0.000)                      | 0.012***<br>(0.001)                   |
| <i>Year 3+ × Reform country</i> | 0.155***<br>(0.001)              | 0.136***<br>(0.004)                 | 0.029***<br>(0.000)                      | 0.017***<br>(0.000)                   |
| Controls                        | Yes                              | Yes                                 | Yes                                      | Yes                                   |
| Year fixed effects              | Yes                              | Yes                                 | Yes                                      | Yes                                   |
| Firm fixed effects              | Yes                              | Yes                                 | Yes                                      | Yes                                   |
| Observations                    | 325,388                          | 325,388                             | 43,192                                   | 43,192                                |
| <i>R</i> <sup>2</sup>           | 0.860                            | 0.808                               | 0.706                                    | 0.677                                 |

Table C2. Placebo tests

| Dep. Var.                                    | (1)                                | (2)                                   | (3)                                      | (4)                                   | (5)                                | (6)                                   | (7)                                      | (8)                                   |
|----------------------------------------------|------------------------------------|---------------------------------------|------------------------------------------|---------------------------------------|------------------------------------|---------------------------------------|------------------------------------------|---------------------------------------|
| Sample                                       | <i>Patent counts<sub>t+1</sub></i> | <i>Patent citations<sub>t+1</sub></i> | <i>Female representation<sub>t</sub></i> | <i>Female empowerment<sub>t</sub></i> | <i>Patent counts<sub>t+1</sub></i> | <i>Patent citations<sub>t+1</sub></i> | <i>Female representation<sub>t</sub></i> | <i>Female empowerment<sub>t</sub></i> |
|                                              | Pre-reform                         |                                       |                                          |                                       |                                    |                                       |                                          |                                       |
| <i>After reform_pseudo1 × Reform country</i> | 0.006<br>(0.231)                   | 0.006<br>(0.397)                      | -0.001<br>(0.929)                        | 0.003<br>(0.375)                      |                                    |                                       |                                          |                                       |
| <i>After reform_pseudo2 × Reform country</i> |                                    |                                       |                                          |                                       | -0.013<br>(0.674)                  | 0.020<br>(0.722)                      | -0.002<br>(0.676)                        | 0.004<br>(0.188)                      |
| Controls                                     | Yes                                | Yes                                   | Yes                                      | Yes                                   | Yes                                | Yes                                   | Yes                                      | Yes                                   |
| Year fixed effects                           | Yes                                | Yes                                   | Yes                                      | Yes                                   | Yes                                | Yes                                   | Yes                                      | Yes                                   |
| Firm fixed effects                           | Yes                                | Yes                                   | Yes                                      | Yes                                   | Yes                                | Yes                                   | Yes                                      | Yes                                   |
| Observations                                 | 283,930                            | 283,930                               | 30,381                                   | 30,381                                | 283,930                            | 283,930                               | 30,381                                   | 30,381                                |
| <i>R</i> <sup>2</sup>                        | 0.831                              | 0.808                                 | 0.741                                    | 0.655                                 | 0.831                              | 0.808                                 | 0.741                                    | 0.655                                 |

Notes. This table presents the regression results for assessing the parallel trends assumption embedded in our DID design. All control variables in Equation 1 are included in the regressions but their results are not tabulated for brevity. All variables are defined in Online Appendix A. *p*-values based on robust standard errors adjusted for clustering by firm are reported in parentheses. \*\*\**p* < 0.01; \*\**p* < 0.05; \**p* < 0.10 (two-tailed tests).

## Appendix D. Supplementary Analyses

Table D1. Tests on possible non-linear effects

|                                             | (1)                                          | (2)                                             | (3)                                          | (4)                                             | (5)                                          | (6)                                             | (7)                                          | (8)                                             |
|---------------------------------------------|----------------------------------------------|-------------------------------------------------|----------------------------------------------|-------------------------------------------------|----------------------------------------------|-------------------------------------------------|----------------------------------------------|-------------------------------------------------|
| Dep. Var.                                   | <i>Patent</i><br><i>counts<sub>t+1</sub></i> | <i>Patent</i><br><i>citations<sub>t+1</sub></i> | <i>Patent</i><br><i>counts<sub>t+1</sub></i> | <i>Patent</i><br><i>citations<sub>t+1</sub></i> | <i>Patent</i><br><i>counts<sub>t+1</sub></i> | <i>Patent</i><br><i>citations<sub>t+1</sub></i> | <i>Patent</i><br><i>counts<sub>t+1</sub></i> | <i>Patent</i><br><i>citations<sub>t+1</sub></i> |
| Sample                                      | 0 female director                            |                                                 | 1 female director                            |                                                 | 2 female directors                           |                                                 | >=3 female directors                         |                                                 |
| <i>After reform</i> × <i>Reform country</i> | 0.084***<br>(0.000)                          | 0.093***<br>(0.000)                             | 0.123***<br>(0.000)                          | 0.096*<br>(0.026)                               | 0.122***<br>(0.000)                          | 0.105**<br>(0.001)                              | 0.092**<br>(0.036)                           | 0.139**<br>(0.026)                              |
| Controls                                    | Yes                                          | Yes                                             | Yes                                          | Yes                                             | Yes                                          | Yes                                             | Yes                                          | Yes                                             |
| Year fixed effects                          | Yes                                          | Yes                                             | Yes                                          | Yes                                             | Yes                                          | Yes                                             | Yes                                          | Yes                                             |
| Firm fixed effects                          | Yes                                          | Yes                                             | Yes                                          | Yes                                             | Yes                                          | Yes                                             | Yes                                          | Yes                                             |
| Observations                                | 28,747                                       | 28,747                                          | 7,756                                        | 7,756                                           | 4,630                                        | 4,630                                           | 2,059                                        | 2,059                                           |
| <i>R</i> <sup>2</sup>                       | 0.841                                        | 0.836                                           | 0.857                                        | 0.874                                           | 0.838                                        | 0.838                                           | 0.891                                        | 0.869                                           |

*Notes.* This table reports the results of tests on possible non-linear effects. All control variables in Equation 1 are included in the regressions but their results are not tabulated for brevity. All variables are defined in Online Appendix A. *p*-values based on robust standard errors adjusted for clustering by firm are reported in parentheses. \*\*\**p* < 0.01; \*\**p* < 0.05; \**p* < 0.10 (two-tailed tests).

Table D2. Other reform characteristics

|                                                              | (1)                                             | (2)                                             | (3)                                          | (4)                                             | (5)                                          | (6)                                             |
|--------------------------------------------------------------|-------------------------------------------------|-------------------------------------------------|----------------------------------------------|-------------------------------------------------|----------------------------------------------|-------------------------------------------------|
| Dep. Var.                                                    | <i>Female</i><br><i>empowerment<sub>t</sub></i> | <i>Female</i><br><i>empowerment<sub>t</sub></i> | <i>Patent</i><br><i>counts<sub>t+1</sub></i> | <i>Patent</i><br><i>citations<sub>t+1</sub></i> | <i>Patent</i><br><i>counts<sub>t+1</sub></i> | <i>Patent</i><br><i>citations<sub>t+1</sub></i> |
| Sample                                                       | BoardEx                                         | BoardEx                                         | Full                                         | Full                                            | Full                                         | Full                                            |
| <i>After reform</i> × <i>Reform country</i>                  | 0.010***<br>(0.000)                             | 0.010***<br>(0.000)                             | 0.187***<br>(0.000)                          | 0.133***<br>(0.000)                             | 0.171***<br>(0.000)                          | 0.124***<br>(0.000)                             |
| <i>After reform</i> × <i>Reform country</i> × <i>Penalty</i> | -0.023***<br>(0.000)                            |                                                 | -0.058***<br>(0.000)                         | -0.042***<br>(0.000)                            |                                              |                                                 |
| <i>After reform</i> × <i>Reform country</i> × <i>Quota</i>   |                                                 | -0.003**<br>(0.037)                             |                                              |                                                 | -0.041***<br>(0.000)                         | -0.035***<br>(0.008)                            |
| Controls                                                     | Yes                                             | Yes                                             | Yes                                          | Yes                                             | Yes                                          | Yes                                             |
| Year fixed effects                                           | Yes                                             | Yes                                             | Yes                                          | Yes                                             | Yes                                          | Yes                                             |
| Firm fixed effects                                           | Yes                                             | Yes                                             | Yes                                          | Yes                                             | Yes                                          | Yes                                             |
| Observations                                                 | 43,192                                          | 43,192                                          | 325,388                                      | 325,388                                         | 325,388                                      | 325,388                                         |
| <i>R</i> <sup>2</sup>                                        | 0.79                                            | 0.676                                           | 0.824                                        | 0.803                                           | 0.824                                        | 0.803                                           |

*Notes.* This table reports the regression results estimating the role of other reform characteristics (i.e., existence of penalty and quota) in the effects of board gender diversity reforms on firm innovation. All control variables in Equation (1) are included in the regressions but their results are not tabulated for brevity. All variables are defined in Online Appendix A. *p*-values based on robust standard errors adjusted for clustering by firm are reported in parentheses. \*\*\**p* < 0.01; \*\**p* < 0.05; \**p* < 0.10 (two-tailed tests)

## Appendix E. Alternative DID Specifications

Recent studies suggest that including already-treated firms in the control group in the staggered DID model may yield biased DID estimators in the presence of time-varying treatment effects (Callaway and Sant'Anna 2021; Baker et al. 2022). Given the lack of consensus on a standard approach to assessing the bias in the staggered DID design, we perform a series of robustness tests recommended by Baker et al. (2022) to alleviate this concern. First, we re-estimate Equation (1) without including control variables to ensure that the inclusion of post-treatment covariates from already-treated firms does not influence the main results. The findings, reported in Table E1, indicate that our main inferences remain unchanged.

Second, following recent research (e.g., Choi et al. 2023; Lai et al. 2024), we specify a traditional  $2 \times 2$  DID design, employing the stacked regression approach based on a cohort-matched sample and excluding already-treated firms from the control group. Specifically, we use firms from countries that adopted reforms in each reform year (a reform cohort) as the treatment group, and firms from countries that did not implement such reforms during our sample period as the control group. We assign a pseudo-reform year to all firms in the control group based on the actual reform year of the treatment firms. We repeat this procedure for each cohort and stack all cohorts together. To make our treatment and benchmark firms more comparable on the observable covariates, we match each treatment firm to a benchmark firm using the nearest neighbor matching technique without replacement on all firm-level control variables in the year prior to the reform. Untabulated results show that our PSM procedure effectively reduces differences between our treatment and benchmark firms prior to the reform. The regression results are reported in Table E2. We find that the coefficient on the interaction term *After reform*  $\times$  *Reform country* is consistently positive and significant across the patent and citation models.

Third, we conduct a DID analysis for each of the eight cohorts identified in the stacked regression test. Tables E3 and E4 summarize the results of this annual DID analysis for the patent and citation models, respectively. We find a significant increase in firm innovation following the implementation of board gender diversity reforms in all eight reform years.<sup>1</sup>

Table E1. Regressions without controls

| Dep. Var.<br>Sample                                | (1)<br><i>Patent counts</i> <sub><i>t+1</i></sub><br>Full | (2)<br><i>Patent citations</i> <sub><i>t+1</i></sub><br>Full |
|----------------------------------------------------|-----------------------------------------------------------|--------------------------------------------------------------|
| <i>After reform</i> $\times$ <i>Reform country</i> | 0.131***<br>(0.000)                                       | 0.082***<br>(0.000)                                          |
| Year fixed effects                                 | Yes                                                       | Yes                                                          |
| Firm fixed effects                                 | Yes                                                       | Yes                                                          |
| Observations                                       | 325,388                                                   | 325,388                                                      |
| <i>R</i> <sup>2</sup>                              | 0.819                                                     | 0.798                                                        |

Table E2. Stacked regressions using a PSM matched sample

| Dep. Var.<br>Sample                                | (1)<br><i>Patent counts</i> <sub><i>t+1</i></sub><br>Cohort-matched | (2)<br><i>Patent citations</i> <sub><i>t+1</i></sub><br>Cohort-matched |
|----------------------------------------------------|---------------------------------------------------------------------|------------------------------------------------------------------------|
| <i>After reform</i>                                | -0.034***<br>(0.000)                                                | -0.037***<br>(0.000)                                                   |
| <i>After reform</i> $\times$ <i>Reform country</i> | 0.097***<br>(0.000)                                                 | 0.100***<br>(0.000)                                                    |
| Controls                                           | Yes                                                                 | Yes                                                                    |
| Cohort $\times$ Year fixed effects                 | Yes                                                                 | Yes                                                                    |
| Cohort $\times$ Firm fixed effects                 | Yes                                                                 | Yes                                                                    |
| Observations                                       | 159,106                                                             | 159,106                                                                |
| <i>R</i> <sup>2</sup>                              | 0.823                                                               | 0.803                                                                  |

Table E3. Summary of results from yearly DID models (Dep. Var: *Patent counts*<sub>*t+1*</sub>)

| Reform<br>Year | Coef. of<br><i>After reform</i> $\times$<br><i>Reform country</i> | # of treatment<br>countries | # of benchmark<br>countries | # of obs. in<br>treatment<br>countries | # of obs. in<br>benchmark<br>countries |
|----------------|-------------------------------------------------------------------|-----------------------------|-----------------------------|----------------------------------------|----------------------------------------|
|----------------|-------------------------------------------------------------------|-----------------------------|-----------------------------|----------------------------------------|----------------------------------------|

<sup>1</sup> During our sample period, there are eight cohorts of reform: 2004 (Sweden), 2006 (Norway), 2007 (Spain), 2009 (Luxembourg), 2010 (Finland and Poland), 2011 (France, Italy, Malaysia, and Thailand), 2012 (Austria, Belgium, Ireland, Singapore, and the United Kingdom), and 2013 (Australia, Denmark, Greece, Hong Kong, Iceland, and the Netherlands).

|      |          |   |    |        |         |
|------|----------|---|----|--------|---------|
| 2004 | 0.048**  | 1 | 34 | 5,621  | 206,907 |
| 2006 | 0.063**  | 1 | 34 | 2,148  | 206,907 |
| 2007 | 0.144*** | 1 | 34 | 1,795  | 206,907 |
| 2009 | 0.116*** | 2 | 34 | 1,611  | 206,907 |
| 2010 | 0.162*** | 2 | 34 | 6,265  | 206,907 |
| 2011 | 0.164*** | 4 | 34 | 31,265 | 206,907 |
| 2012 | 0.264*** | 4 | 34 | 29,051 | 206,907 |
| 2013 | 0.287*** | 6 | 34 | 40,725 | 206,907 |

Table E4. Summary of results from yearly DID models (Dep. Var:  $Patent\ citations_{t+1}$ )

| Reform Year | Coef. of $After\ reform \times Reform\ country$ | # of treatment countries | # of benchmark countries | # of obs. in treatment countries | # of obs. in benchmark countries |
|-------------|-------------------------------------------------|--------------------------|--------------------------|----------------------------------|----------------------------------|
| 2004        | 0.091***                                        | 1                        | 34                       | 5,621                            | 206,907                          |
| 2006        | 0.061**                                         | 1                        | 34                       | 2,148                            | 206,907                          |
| 2007        | 0.253***                                        | 1                        | 34                       | 1,795                            | 206,907                          |
| 2009        | 0.152***                                        | 2                        | 34                       | 1,611                            | 206,907                          |
| 2010        | 0.198***                                        | 2                        | 34                       | 6,265                            | 206,907                          |
| 2011        | 0.205***                                        | 4                        | 34                       | 31,265                           | 206,907                          |
| 2012        | 0.263***                                        | 4                        | 34                       | 29,051                           | 206,907                          |
| 2013        | 0.261***                                        | 6                        | 34                       | 40,725                           | 206,907                          |

*Notes.* This table presents the results of alternative difference-in-differences specifications. Table E1 presents the results without the inclusion of the control variables. Table E2 presents the results using a stacked regression approach using a PSM matched sample based on all firm-level controls in the year prior to the reform. Table E3 and Table E4 report the summary of year-by-year difference-in-differences regression results estimating the effect of board gender diversity reforms on innovation for firms in countries with reforms implemented in year  $t$  (the treatment countries), relative to firms in countries without reforms implemented during our sample period (the benchmark countries). The regression specified in Tables E2, E3 and E4 is:  $Patent\ counts_{t+1}/Patent\ citations_{t+1} = \beta_0 + \beta_1 After\ reform + \beta_2 Reform\ country + \beta_3 After\ reform \times Reform\ country + \sum \beta_m Controls + \sum \beta_k Year\ fixed\ effects + \sum \beta_n Firm\ fixed\ effects + \varepsilon$ . All control variables in Equation 1 are included in the regressions but their results are not tabulated for brevity. All variables are defined in Online Appendix B.  $p$ -values based on robust standard errors adjusted for clustering by firm are reported in parentheses. \*\*\* $p < 0.01$ ; \*\* $p < 0.05$ ; \* $p < 0.10$  (two-tailed tests).

## References

- Baker, A.C., Larcker, D.F. and Wang, C.C., 2022. How much should we trust staggered difference-in-differences estimates?. *Journal of Financial Economics* 144(2), 370-395.
- Callaway, B. and Sant'Anna, P.H., 2021. Difference-in-differences with multiple time periods. *Journal of Econometrics* 225(2), 200-230.
- Choi, H.S. and Loh, R.K., 2023. Physical frictions and digital banking adoption. *Management Science* 70(10), 6597–6621.
- Lai, S., Lin, C. and Ma, X., 2024. RegTech adoption and the cost of capital. *Management Science*, 70(1), 309-331.

## Appendix F. Other Robustness Checks

Prior research finds that gender diversity at the C-suite level (e.g., Huang and Kisgen 2013; Faccio et al. 2016) and other executive characteristics such as CEO compensation (Sanders and Hambrick 2007) may also affect firms' strategic decisions. To address the concern that our results may be driven by these executive characteristics, we re-estimate our main analysis by including two additional control variables: *CEO female*, an indicator variable that equals 1 if the firm's CEO is female and 0 otherwise, to capture gender diversity at the C-suite level (Datta et al. 2021),<sup>2</sup> and *CEO compensation*, calculated as the natural logarithm of the sum of all CEO compensation (salary, bonus, equity-linked, pension, and other). Since the data on constructing these two variables are sourced from BoardEx, we perform this analysis using the *BoardEx* sample. The results (reported in Table F1) show that our inference remains unchanged.<sup>3</sup>

As with other studies on firm innovation (i.e., Zhong 2018; Moshirian et al. 2021; Tsang et al. 2021), our main sample includes many firms that have zero patents. Additionally, we exclude U.S. firms from our main sample to mitigate potential large sample bias. To ensure our results are not sensitive to these sample selection choices, we repeat our main analysis by (1) excluding firms that have never filed patent applications during our sample period (Table F2) and (2) including U.S. firms in our sample (Table F3). We find the results similar to our main findings in both tests.<sup>4</sup>

In our main analyses, we identify treatment firms based on their country of incorporation. It is plausible that some firms in our control group, while incorporated in countries that did not implement board gender diversity reforms, may conduct operations in countries that did, potentially subjecting them to the effects of these reforms. While such cases would bias against our finding of a significant effect of the reforms, we conduct an additional analysis by excluding multinational firms, defined as firms with non-zero foreign sales following Denis et al. (2002), and find consistent results (Table F4).

To address concerns regarding the impact of potentially confounding changes in national institutions, we control for other broad corporate governance reforms identified in the literature. These include corporate board reforms aimed at enhancing board independence and monitoring (Fauver et al. 2017), the mandatory adoption of International Financial Reporting Standards (IFRS) to improve the quality, comparability, and transparency of financial reporting (Hong et al 2014), and merger and acquisition law reforms to strengthen the market for corporate control (Lel and Miller 2015). Specifically, we generate indicator variables *After reform\_Board independence*, *After reform\_IFRS*, and *After reform\_M&A law* to denote the periods following the implementation of each of these reforms, respectively. We then add the interaction term between each of these variables with *Reform country* in Equation (1). Table F5 presents the results, which show a significant positive impact of board gender diversity reforms on firm innovation, after controlling for other reforms.

Furthermore, our primary measure of female empowerment does not differentiate between chair and member roles within major committees, as our goal is to capture the overall influence of women in leadership and decision-making for key corporate strategies. Concerns may arise that female directors' committee memberships could still be subject to tokenism, serving as symbolic diversity without real influence. However, we argue that tokenism is unlikely in our study for two main reasons. First, the lack of reform mandates requiring female representation on major committees reduces the risk of compliance-driven tokenism. Second, the prestige and authority of major board committees, along with the increased scrutiny from stakeholders (Zhu et al., 2014; Knippen et al., 2019; Field et al., 2020), further mitigate the possibility of symbolic roles. Nevertheless, to address this concern, we conduct an additional analysis distinguishing between the effects of serving as a chair versus a member of these

---

<sup>2</sup> We also employ an alternative measure of C-suite gender diversity, *Female executives*, which is an indicator variable set to 1 if the firm's C-suite (CEO, CFO, and COO) includes at least one female member, and 0 otherwise. Our inference remains unchanged with this measurement.

<sup>3</sup> Our results indicate there is no significant relationship between female CEO and innovation. Taken together with our main findings, board gender diversity demonstrates a more systemic impact on fostering innovation than gender diversity in the C-suite does.

<sup>4</sup> As the U.S. has not adopted board gender diversity reforms during our sample period, we are not able to examine the effect of the reforms on innovation for U.S. firms. Nevertheless, we find that increased women board representation and empowerment leads to increased patent counts and citations for U.S. firms when using a change model:  $\Delta Patent\ counts\ (\Delta Patent\ citations) = \beta_0 + \beta_1 \Delta Female\ representation\ (\Delta Female\ empowerment) + \sum \beta_m \Delta Control\ variables + \sum \beta_k Year\ fixed\ effects + \sum \beta_l Firm\ fixed\ effects + \varepsilon$

key committees. As shown in Table F6, we find that board gender diversity reforms significantly enhance female empowerment in both capacities. Moreover, the reform-driven empowerment stemming from participation in major committees, regardless of the specific role, contributes substantially to improving a firm's innovative capacity. These findings suggest that while serving as chair of a major committee may confer greater influence, membership in a major committee is itself a meaningful form of empowerment. It allows female directors to engage in critical decision-making and governance, which can substantially shape a firm's strategic direction and innovation outcomes.

Lastly, to address concerns about time-varying industry heterogeneity in board composition and innovation activities, we replace *Year fixed effects* with *Industry fixed effects*  $\times$  *Year fixed effects*. We also follow Tsang et al. (2021) to assess the sensitivity of our results to alternative measures of innovation, including truncation-adjusted patent counts and citations, as well as innovation efficiency, which is measured by the ratio of patents filed (and eventually granted) to R&D capital, and the ratio of patent citations received to R&D capital. Untabulated results show that our inferences remain consistent across all these tests.

Table F1. Controlling for CEO compensation and CEO gender

| Dep. Var.<br>Sample                                | (1)                                                   | (2)                                                      |
|----------------------------------------------------|-------------------------------------------------------|----------------------------------------------------------|
|                                                    | <i>Patent counts</i> <sub><i>t</i>+1</sub><br>BoardEx | <i>Patent citations</i> <sub><i>t</i>+1</sub><br>BoardEx |
| <i>After reform</i> $\times$ <i>Reform country</i> | 0.216***<br>(0.000)                                   | 0.255***<br>(0.000)                                      |
| <i>CEO compensation</i>                            | -0.008<br>(0.220)                                     | -0.023***<br>(0.002)                                     |
| <i>CEO female</i>                                  | -0.025<br>(0.281)                                     | -0.034<br>(0.245)                                        |
| Controls                                           | Yes                                                   | Yes                                                      |
| Year fixed effects                                 | Yes                                                   | Yes                                                      |
| Firm fixed effects                                 | Yes                                                   | Yes                                                      |
| Observations                                       | 43,192                                                | 43,192                                                   |
| <i>R</i> <sup>2</sup>                              | 0.836                                                 | 0.848                                                    |

Table F2. Excluding firms without patents

| Dep. Var.<br>Sample                                | (1)                                                                                       | (2)                                                                                          |
|----------------------------------------------------|-------------------------------------------------------------------------------------------|----------------------------------------------------------------------------------------------|
|                                                    | <i>Patent counts</i> <sub><i>t</i>+1</sub><br>Full sample excluding firms without patents | <i>Patent citations</i> <sub><i>t</i>+1</sub><br>Full sample excluding firms without patents |
| <i>After reform</i> $\times$ <i>Reform country</i> | 0.219***<br>(0.000)                                                                       | 0.103***<br>(0.000)                                                                          |
| Controls                                           | Yes                                                                                       | Yes                                                                                          |
| Year fixed effects                                 | Yes                                                                                       | Yes                                                                                          |
| Firm fixed effects                                 | Yes                                                                                       | Yes                                                                                          |
| Observations                                       | 88,876                                                                                    | 88,876                                                                                       |
| <i>R</i> <sup>2</sup>                              | 0.794                                                                                     | 0.772                                                                                        |

Table F3. Including U.S. firms from the sample

| Dep. Var.<br>Sample                                | (1)                                                                            | (2)                                                                               |
|----------------------------------------------------|--------------------------------------------------------------------------------|-----------------------------------------------------------------------------------|
|                                                    | <i>Patent counts</i> <sub><i>t</i>+1</sub><br>Full sample including U.S. firms | <i>Patent citations</i> <sub><i>t</i>+1</sub><br>Full sample including U.S. firms |
| <i>After reform</i> $\times$ <i>Reform country</i> | 0.133***<br>(0.000)                                                            | 0.139***<br>(0.000)                                                               |
| Controls                                           | Yes                                                                            | Yes                                                                               |
| Year fixed effects                                 | Yes                                                                            | Yes                                                                               |
| Firm fixed effects                                 | Yes                                                                            | Yes                                                                               |
| Observations                                       | 478,842                                                                        | 478,842                                                                           |
| <i>R</i> <sup>2</sup>                              | 0.826                                                                          | 0.791                                                                             |

Table F4. Excluding multinational firms from the sample

| Dep. Var.<br>Sample                                | (1)                                                                                     | (2)                                                                                        |
|----------------------------------------------------|-----------------------------------------------------------------------------------------|--------------------------------------------------------------------------------------------|
|                                                    | <i>Patent counts</i> <sub><i>t</i>+1</sub><br>Full sample excluding multinational firms | <i>Patent citations</i> <sub><i>t</i>+1</sub><br>Full sample excluding multinational firms |
| <i>After reform</i> $\times$ <i>Reform country</i> | 0.186***<br>(0.000)                                                                     | 0.196***<br>(0.000)                                                                        |
| Controls                                           | Yes                                                                                     | Yes                                                                                        |

|                    |         |         |
|--------------------|---------|---------|
| Year fixed effects | Yes     | Yes     |
| Firm fixed effects | Yes     | Yes     |
| Observations       | 133,159 | 133,159 |
| $R^2$              | 0.789   | 0.815   |

Table F5. Controlling for other reforms

| Dep. Var.<br>Sample                                                  | (1)                                                | (2)                                                   |
|----------------------------------------------------------------------|----------------------------------------------------|-------------------------------------------------------|
|                                                                      | <i>Patent counts</i> <sub><i>t+1</i></sub><br>Full | <i>Patent citations</i> <sub><i>t+1</i></sub><br>Full |
| <i>After reform</i> × <i>Reform country</i>                          | 0.158***<br>(0.000)                                | 0.111***<br>(0.000)                                   |
| <i>After_reform_Board independence</i> × <i>Board reform country</i> | -0.035***<br>(0.000)                               | -0.053***<br>(0.000)                                  |
| <i>After reform_IFRS</i> × <i>IFRS country</i>                       | 0.004<br>(0.572)                                   | 0.010<br>(0.370)                                      |
| <i>After reform_M&amp;A laws</i> × <i>M&amp;A law reform country</i> | -0.026<br>(0.110)                                  | -0.138***<br>(0.000)                                  |
| Controls                                                             | Yes                                                | Yes                                                   |
| Year fixed effects                                                   | Yes                                                | Yes                                                   |
| Firm fixed effects                                                   | Yes                                                | Yes                                                   |
| Observations                                                         | 325,388                                            | 325,388                                               |
| $R^2$                                                                | 0.824                                              | 0.803                                                 |

Table F6. Alternative measures of female empowerment

| Dep. Var.<br>Sample                                                                                                                     | <i>Female Empowerment</i> <sub><i>t</i></sub><br>( <i>member</i> ) | <i>Female Empowerment</i> <sub><i>t</i></sub><br>( <i>chair</i> ) | <i>Patent counts</i> <sub><i>t+3</i></sub><br>BoardEx | <i>Patent citations</i> <sub><i>t+3</i></sub><br>BoardEx |
|-----------------------------------------------------------------------------------------------------------------------------------------|--------------------------------------------------------------------|-------------------------------------------------------------------|-------------------------------------------------------|----------------------------------------------------------|
|                                                                                                                                         | BoardEx                                                            | BoardEx                                                           | BoardEx                                               | BoardEx                                                  |
| <i>After reform</i> × <i>Reform country</i>                                                                                             | 0.007***                                                           | 0.002***<br>(0.000)                                               | 0.213***<br>(0.000)                                   | 0.257***<br>(0.000)                                      |
| <i>After reform</i> × <i>Reform country</i> × $\Delta$ <i>Female representation</i> <sub>(2 years post-reform)</sub> <sup>(1)</sup>     |                                                                    |                                                                   | 0.012*<br>(0.060)                                     | 0.012*<br>(0.082)                                        |
| <i>After reform</i> × <i>Reform country</i> × $\Delta$ <i>Female empowerment_member</i> <sub>(2 years post-reform)</sub> <sup>(2)</sup> |                                                                    |                                                                   | 0.056***<br>(0.000)                                   | 0.061***<br>(0.000)                                      |
| <i>After reform</i> × <i>Reform country</i> × $\Delta$ <i>Female empowerment_chair</i> <sub>(2 years post-reform)</sub> <sup>(3)</sup>  |                                                                    |                                                                   | 0.053***<br>(0.000)                                   | 0.072***<br>(0.000)                                      |
| F-Tests of Coefficients                                                                                                                 |                                                                    |                                                                   |                                                       |                                                          |
| (1) – (2)                                                                                                                               |                                                                    |                                                                   | -0.044***                                             | -                                                        |
| (1) – (3)                                                                                                                               |                                                                    |                                                                   | -0.041***                                             | -                                                        |
| (2) – (3)                                                                                                                               |                                                                    |                                                                   | 0.003                                                 | -0.011                                                   |
| Controls                                                                                                                                | Yes                                                                | Yes                                                               | Yes                                                   | Yes                                                      |
| Year fixed effects                                                                                                                      | Yes                                                                | Yes                                                               | Yes                                                   | Yes                                                      |
| Firm fixed effects                                                                                                                      | Yes                                                                | Yes                                                               | Yes                                                   | Yes                                                      |
| Observations                                                                                                                            | 43,192                                                             | 43,192                                                            | 35,968                                                | 35,968                                                   |
| $R^2$                                                                                                                                   | 0.618                                                              | 0.412                                                             | 0.836                                                 | 0.854                                                    |

Notes. This table reports the results of additional robustness tests. All control variables in Equation 1 are included in the regressions but their results are not tabulated for brevity. All variables are defined in Online Appendix B.  $p$ -values based on robust standard errors adjusted for clustering by firm are reported in parentheses. \*\*\* $p < 0.01$ ; \*\* $p < 0.05$ ; \* $p < 0.10$  (two-tailed tests).

## References

- Datta, S., Doan, T. and Toscano, F., 2021. Top executive gender, board gender diversity, and financing decisions: Evidence from debt structure choice. *Journal of Banking & Finance*, 125, 106070.
- Denis, D.J., Denis, D.K. and Yost, K., 2002. Global diversification, industrial diversification, and firm value. *The Journal of Finance*, 57(5), 1951-1979.
- Faccio, M., Marchica, M.T. and Mura, R., 2016. CEO gender, corporate risk-taking, and the efficiency of capital allocation. *Journal of Corporate Finance*, 39, 193-209.
- Fauver, L., Hung, M., Li, X. and Taboada, A.G., 2017. Board reforms and firm value: Worldwide evidence. *Journal of Financial Economics* 125(1), 120-142.

- Field, L.C., Souther, M.E. and Yore, A.S., 2020. At the table but can not break through the glass ceiling: Board leadership positions elude diverse directors. *Journal of Financial Economics* 137(3), 787-814.
- Hong, H.A., Hung, M. and Lobo, G.J., 2014. The impact of mandatory IFRS adoption on IPOs in global capital markets. *The Accounting Review* 89(4), 1365-1397.
- Huang, J. and Kisgen, D.J., 2013. Gender and corporate finance: Are male executives overconfident relative to female executives?. *Journal of financial Economics* 108(3), 822-839.
- Knippen, J.M., Shen, W. and Zhu, Q., 2019. Limited progress? The effect of external pressure for board gender diversity on the increase of female directors. *Strategic Management Journal* 40(7), 1123-1150
- Lel, U. and Miller, D.P., 2015. Does takeover activity cause managerial discipline? Evidence from international M&A laws. *The Review of Financial Studies* 28(6), 1588-1622.
- Moshirian, F., Tian, X., Zhang, B. and Zhang, W., 2021. Stock market liberalization and innovation. *Journal of Financial Economics*, 139(3), 985-1014.
- Sanders, W.G. and Hambrick, D.C., 2007. Swinging for the fences: The effects of CEO stock options on company risk taking and performance. *Academy of Management Journal*, 50(5), 1055-1078.
- Tsang, A., Wang, K.T., Liu, S. and Yu, L., 2021. Integrating corporate social responsibility criteria into executive compensation and firm innovation: International evidence. *Journal of Corporate Finance* 70, 102070.
- Zhong, R.I. 2018. Transparency and firm innovation. *Journal of Accounting and Economics* 66(1), 67-93.
- Zhu, D.H., Shen, W. and Hillman, A.J., 2014. Recategorization into the in-group: The appointment of demographically different new directors and their subsequent positions on corporate boards. *Administrative Science Quarterly* 59(2), 240-270.
